# Supplementary material for: Effects of dietary gamma-aminobutyric acid supplementation on amino acid profile, intestinal immunity, and microbiota in ETEC-challenged piglets
Source: Royal Society of Chemistry journal article supplement (doi:10.1039/d0fo01729a), 2020-01-01
Supplement: d0fo01729a3.pdf [file d0fo01729a3.pdf]

**Supplementary Figure1.** Effects of GABA on intestinal morphology of ETEC-challenged piglets in E (n=10) and GE (n=8). V, villus height; C, crypt depth; V/C, the ratio of villus height to crypt depth. No significant differences in jejunal (A, B) and ileal (C, D) morphology ( $HE \times 100$ ) were found between E and GE groups. Unpaired t-test was used for analyzation of the date (Mean  $\pm$  SEM).
